# Supplementary material for: An Assessment of the Longitudinal Construct Validity of the Pain Behavioral Scale (PaBS) in a Saudi Population with Chronic Low Back Pain: A Preliminary Study
Source: MDPI journal article supplement (doi:10.3390/healthcare11121743), 2023-06-14
Supplement: s1 [file s1]

File S2: Correlations between change from baseline PaBS scores and those of other measures for longitudinal construct validity assessment

| Instrument        | PaBS                   | NPS                     | MODI                    | FABQ                    |                       |                        | PCS                     |                        |                       |
|-------------------|------------------------|-------------------------|-------------------------|-------------------------|-----------------------|------------------------|-------------------------|------------------------|-----------------------|
|                   |                        |                         |                         | total                   | W                     | PA                     | total                   | rumination             | magnif.               |
|                   | r                      | r                       | r                       | r                       | r                     | r                      | r                       | r                      | r                     |
| Change in measure | (95% CI)               | (95% CI)                | (95% CI)                | (95% CI)                | (95% CI)              | (95% CI)               | (95% CI)                | (95% CI)               | (95% CI)              |
| NPS               | -0.11<br>(-0.50, 0.31) |                         |                         |                         |                       |                        |                         |                        |                       |
| MODI              | 0.03<br>(-0.39, 0.44)  | 0.45*<br>(0.05, 0.73)   |                         |                         |                       |                        |                         |                        |                       |
| Total FABQ        | 0.02<br>(-0.39, 0.43)  | 0.47*<br>(0.08, 0.74)   | 0.73***<br>(0.46, 0.88) |                         |                       |                        |                         |                        |                       |
| FABQ W            | -0.02<br>(-0.43, 0.39) | 0.39<br>(-0.02, 0.69)   | 0.72***<br>(0.44, 0.87) | 0.86***<br>(0.69, 0.94) |                       |                        |                         |                        |                       |
| FABQ PA           | 0.26<br>(-0.17, 0.60)  | 0.41<br>(-0.01, 0.70)   | 0.55**<br>(0.17, 0.78)  | 0.73***<br>(0.46, 0.88) | 0.35<br>(-0.07, 0.67) |                        |                         |                        |                       |
| Total PCS         | 0.17<br>(-0.26, 0.55)  | 0.55***<br>(0.18, 0.79) | 0.53**<br>(0.15, 0.77)  | 0.42*<br>(0.01, 0.71)   | 0.48*<br>(0.09, 0.75) | 0.22<br>(-0.21, 0.58)  |                         |                        |                       |
| PCS rumination    | 0.44*<br>(0.04, 0.72)  | 0.43*<br>(0.03, 0.72)   | 0.50*<br>(0.11, 0.76)   | 0.49*<br>(0.10, 0.75)   | 0.60*<br>(0.25, 0.81) | 0.28<br>(-0.15, 0.62)  | 0.83***<br>(0.63, 0.92) |                        |                       |
| PCS magnification | -0.27<br>(-0.61, 0.16) | 0.31<br>(-0.11, 0.64)   | 0.14<br>(-0.29, 0.52)   | 0.02<br>(-0.40, 0.43)   | 0.11<br>(-0.32, 0.50) | -0.16<br>(-0.53, 0.27) | 0.66***<br>(0.34, 0.84) | 0.33<br>(-0.10, 0.65)  |                       |
| PCS helplessness  | 0.13<br>(-0.30, 0.51)  | 0.54**<br>(0.17, 0.78)  | 0.55**<br>(0.18, 0.79)  | 0.41<br>(-0.0003, 0.70) | 0.38<br>(-0.04, 0.69) | 0.31<br>(-0.12, 0.64)  | 0.89***<br>(0.75, 0.95) | 0.59**<br>(0.24, 0.81) | 0.43*<br>(0.02, 0.72) |

File S3: Frequency and percentage of participants showing improvement, no change, or worsening behavior for each instrument

| Instrument               | Change      | Amount of change | Frequency (n) | Percent (%) |
|--------------------------|-------------|------------------|---------------|-------------|
| PaBS Change Score        | Improvement | > 4 units        | 2             | 8.7         |
|                          |             | 3 to 4 units     | 7             | 30.4        |
|                          |             | 1 to 2 units     | 7             | 30.4        |
|                          | No change   | 0 units          | 2             | 8.7         |
|                          | Worsening   | 1 to 2 units     | 5             | 21.7        |
| NPS Change Score         | Improvement | > 4 units        | 5             | 21.7        |
|                          |             | 3 to 4 units     | 2             | 8.7         |
|                          |             | 1 to 2 units     | 7             | 30.4        |
|                          | No change   | 0 units          | 4             | 17.4        |
|                          | Worsening   | 1 to 2 units     | 2             | 8.7         |
|                          |             | > 2 units        | 3             | 13.0        |
| MODI Change category     | Improvement | 1 to 2 units     | 11            | 47.8        |
|                          | No change   | 0 units          | 7             | 30.4        |
|                          | Worsening   | 1 to 2 units     | 5             | 21.7        |
| MODI Change Score        | Improvement | > 30 units       | 6             | 26.1        |
|                          |             | 21 to 30 units   | 3             | 13.0        |
|                          |             | 11 to 20 units   | 2             | 8.7         |
|                          |             | 1 to 10 units    | 3             | 13.0        |
|                          | No change   | No change        | 1             | 4.4         |
|                          | Worsening   | 1 to 10          | 6             | 26.1        |
|                          |             | 11 to 20         | 2             | 8.7         |
| FABQ Total Change        | Improvement | > 30 units       | 7             | 30.4        |
|                          |             | 21 to 30 units   | 2             | 8.7         |
|                          |             | 11 to 20 units   | 5             | 21.7        |
|                          |             | 1 to 10 units    | 4             | 17.4        |
|                          | Worsening   | 1 to 10          | 3             | 13.0        |
|                          |             | 11 to 20         | 2             | 8.7         |
| FABQ-W Change            | Improvement | > 30 units       | 1             | 4.4         |
|                          |             | 21 to 30 units   | 5             | 21.7        |
|                          |             | 11 to 20 units   | 4             | 17.4        |
|                          |             | 1 to 10 units    | 6             | 26.1        |
|                          | No change   | 0 units          | 1             | 4.4         |
|                          | Worsening   | 1 to 10          | 6             | 26.1        |
| FABQ-PA Change           | Improvement | 11 to 20 units   | 7             | 30.4        |
|                          |             | 1 to 10 units    | 7             | 30.4        |
|                          | No change   | 0 units          | 1             | 4.4         |
|                          | Worsening   | 1 to 10          | 8             | 34.8        |
| PCS Total Change         | Improvement | 21 to 30 units   | 3             | 13.0        |
|                          |             | 11 to 20 units   | 4             | 17.4        |
|                          |             | 1 to 10 units    | 12            | 52.2        |
|                          | Worsening   | 1 to 10          | 4             | 17.4        |
| PCS Rumination Change    | Improvement | 1 to 10 units    | 16            | 69.6        |
|                          | No change   | 0 units          | 2             | 8.7         |
|                          | Worsening   | 1 to 10          | 5             | 21.7        |
| PCS Magnification Change | Improvement | 1 to 10 units    | 11            | 47.8        |
|                          | No change   | 0 units          | 7             | 30.4        |
|                          | Worsening   | 1 to 10          | 5             | 21.7        |

| Instrument              | Change      | Amount of change | Frequency<br>(n) | Percent<br>(%) |
|-------------------------|-------------|------------------|------------------|----------------|
|                         |             |                  |                  |                |
| PCA Helplessness Change | Improvement | 11 to 20 units   | 2                | 8.7            |
|                         |             | 1 to 10 units    | 16               | 69.6           |
|                         | No change   | 0 units          | 3                | 13.0           |
|                         | Worsening   | 1 to 10          | 2                | 8.7            |
|                         |             |                  |                  |                |
