# Supplementary material for: An Assessment of the Longitudinal Construct Validity of the Pain Behavioral Scale (PaBS) in a Saudi Population with Chronic Low Back Pain: A Preliminary Study
Source: MDPI journal article supplement (doi:10.3390/healthcare11121743), 2023-06-14
Supplement: s1 [file s1]

Table S1. Components of physical performance tests and PaBS descriptive data

|                       | Minimum | Maximum | Mean  | Std.<br>Deviation |
|-----------------------|---------|---------|-------|-------------------|
| Trunk flexion (sec)   | 15      | 52      | 29.80 | 9.98              |
| Sit to stand (sec)    | 7       | 24      | 16.34 | 4.35              |
| Timed up and go (sec) | 6       | 16      | 9.16  | 2.64              |
| Loaded reach (cm)     | 21      | 39      | 29.95 | 5.49              |
| 50-foot walk (s)*     | 9       | 37      | 13.86 | 5.89              |

(Baseline)

Table S2. Components of physical performance tests and PaBS descriptive data (follow-up)

|                       | Minimum | Maximum | Mean  | Std.<br>Deviation |
|-----------------------|---------|---------|-------|-------------------|
| Trunk flexion (sec)   | 10      | 38.28   | 25.28 | 7.13              |
| Sit to stand (sec)    | 5       | 27      | 14.80 | 4.38              |
| Timed up and go (sec) | 6       | 15      | 8.93  | 2.18              |
| Loaded reach (cm)     | 18      | 47      | 29.30 | 6.23              |
| 50-foot walk (sec)    | 8       | 34      | 12.67 | 5.30              |

Table S3: Frequency of the pain related behaviors during physical performance tests  
(Baseline)

|                        | Sighing<br>(yes) | Breath-hold<br>(yes) | Grimacing<br>(yes) | Grimacing<br>(yes) | Rubbing<br>(yes) | Antalgic gait<br>(yes) |
|------------------------|------------------|----------------------|--------------------|--------------------|------------------|------------------------|
| Trunk flexion, n (%)   | 7 (30.4)         | 9 (39.1)             | 4 (17.4)           | 0                  | 0                | NA*                    |
| Sit to stand, n (%)    | 4 (17.4)         | 3 (13)               | 2 (8.7)            | 0                  | 0                | NA*                    |
| Timed up and go, n (%) | 1 (4.3)          | 1 (4.3)              | 1 (4.3)            | 0                  | 0                | 0                      |
| Loaded reach, n (%)    | 3 (13)           | 3 (13)               | 4 (17.4)           | 0                  | 0                | NA*                    |
| 50-foot walk, n (%)    | 1 (4.3)          | 3 (13)               | 2 (8.7)            | 1 (4.3)            | 1 (4.3)          | 0                      |

\*NA: not applicable

Table S4: Frequency of the pain related behaviors during physical performance tests (follow-up)

|                        | Sighing<br>(yes) | Breath-hold<br>(yes) | Grimacing<br>(yes) | Grimacing<br>(yes) | Rubbing<br>(yes) | Antalgic gait<br>(yes) |
|------------------------|------------------|----------------------|--------------------|--------------------|------------------|------------------------|
| Trunk flexion, n (%)   | 7 (30.4)         | 4 (17.4)             | 0                  | 0                  | 0                | NA*                    |
| Sit to stand, n (%)    | 1 (4.3)          | 3 (13)               | 1 (4.3)            | 0                  | 0                | NA*                    |
| Timed up and go, n (%) | 0                | 0                    | 0                  | 0                  | 0                | 2 (8.7)                |
| Loaded reach, n (%)    | 0                | 0                    | 3 (13)             | 0                  | 0                | NA*                    |
| 50-foot walk, n (%)    | 0                | 0                    | 1 (4.3)            | 0                  | 0                | 1 (4.3)                |

\*NA: not applicable

Table S5: Differences in physical performance tests and PaBS descriptive data

|                       | Baseline<br>Mean (SD) | Follow-up<br>Mean (SD) | Mean difference<br>(95% CI) | <i>t</i> | <i>p</i> value |
|-----------------------|-----------------------|------------------------|-----------------------------|----------|----------------|
| Trunk flexion (sec)   | 29.80 (9.98)          | 25.28 (7.13)           | 4.74 (1.45–8.04)            | 2.98     | 0.01           |
| Sit to stand (sec)    | 16.34 (4.35)          | 14.80 (4.38)           | 1.53 (0.04–3.03)            | 2.13     | 0.04           |
| Timed up and go (sec) | 9.16 (2.64)           | 8.93 (2.18)            | 0.68 (–0.16–1.53)           | 1.66     | 0.11           |
| Loaded reach (cm)     | 29.95 (5.49)          | 29.30 (6.23)           | 0.65 (–2.01–3.31)           | 0.50     | 0.61           |
| 50-foot walk (sec)    | 13.86 (5.89)          | 12.67 (5.30)           | 1.19 (–1.61–4)              | 0.88     | 0.38           |
